# Supplementary material for: Synthesis of spiropyrans: H-abstractions in 3-cycloalkenyloxybenzopyrans
Source: Beilstein J Org Chem. 2007 Mar 21;3:14. doi: 10.1186/1860-5397-3-14 (PMC1847525; doi:10.1186/1860-5397-3-14)
Supplement: File 1 — Experimental Data. The data provided represents the yield, melting point, IR, 1H NMR and elemental analysis of the compounds. [file Beilstein_J_Org_Chem-03-14-s001.doc]

**Experimental**

**General**

IR spectra were recorded on a Buck Scientific 500 spectrophotometer using KBr pellets and UV spectra on U-2000 Hitachi-Spectrophotometer. 1H NMR spectra were recorded on a 300 MHz Bruker spectrometer using TMS as internal standard. Melting points were determined in open capillaries and are uncorrected.

**General method for the synthesis of 3-cyclopentenyloxy-6-chloro-2-(2'-furyl)-4-oxo-4*H*-1-benzopyran 1a.**

The 3-hydroxychromone, **3** (2.62 g, 0.01mol), 3-cyclopentenyl bromide (1.67 g, 0.012mol), dry K2CO3 (1.0 g) and tetrabutylammonium iodide (200 mg) were refluxed in acetone (25 ml) for 4h. The reaction mixture was filtered, evaporated and the residue was chromatographed to obtain **1a.**

The other compounds **1b, 1c** and **1d** were obtained by using this procedure and the compounds **2a-2c** were obtained starting from **4**.

**Photolysis of 3-cycloalkenyloxy-6-chloro-2-(2'-furyl)-4-oxo-4*H*-1-benzopyran, 1a-1d.**

A general procedure: A deoxygenated methanol solution of the compound **1a** (200 mg, 0.0006 mol) was photolysed with light from a 125 W mercury lamp, in a pyrex reactor under nitrogen atmosphere 35min. The photolysate was chromatographed over a column of silica-gel (100-200 mesh) to yield **1a** (30%, mmp), **5a and 6a.**

**Photolysis of 3-cycloalkenyloxy-6-chloro-2-(5**'**-methyl-2'-furyl)-4-oxo-4*H*-1-benzopyran 2a-2c.**

A deoxygenated methanolic solution of the compound **2a** (200 mg, 0.0006 mol) was photolysed with light from a 125 W mercury lamp, in a pyrex reactor under similar condition as used in **5.1.3** to yield **2a** (35%, mmp) and **7a**(R = CH3).

Experimental Data

Compound **1a** (R = H)**.** Yield 54%, white solid; mp 78-80 ºC; **max THF(nm) 257, 348 **max(cm-1) 1639 (C=O), 1602 (C=C); δH (CDCl3) 8.20 (1H, d, *J*m=2.4 Hz, H-5), 7.72 (1H, d, *J*5',4'=1.7 Hz, H-5'), 7.64 (1H, dd, *J*m,o 2.4 Hz, 9.0 Hz, H-7), 7.55 (1H, d, *J*m=9.0 Hz, H-8), 7.42 (1H, d, *J*3',4' 3.6 Hz, H-3'), 6.60 (1H, dd, *J*4',5'=1.7 Hz, *J*4',3'=3.6 Hz, H-4'), 5.88-5.81 (2H, m, H- 2",3"), 5.55-6.48 (1H, m, H-1"), 2.53-1.97 (4H, m, H-4",5"). MS (EI): *m/z* 328 (M+, 100%). Anal. Calcd. for C18H13ClO4: C, 65.76; H, 3.99. Found: C, 65.79; H, 3.95.

Compound **1b**(R = H)**.** Yield 62%, white solid; mp 115-118 ºC; **max THF(nm) 260, 353 **max(cm-1) 1638 (C=O), 1602 (C=C); δH (CDCl3) 8.16 (1H, d, *J*m=2.4 Hz, H-5), 7.67 (1H, d, *J*5',4'=1.7 Hz, H-5'), 7.60 (1H, dd, *J*m,o 2.4 Hz, 9.0 Hz, H-7), 7.50 (1H, d, *J*m=9.0 Hz, H-8), 7.42 (1H, d, *J*3',4' 3.6 Hz, H-3'), 6.60 (1H, dd, *J*4',5'=1.7 Hz, *J*4',3'=3.6 Hz, H-4'), 5.90-5.82 (2H, m, H- 2",3"), 5.45-5.42 (1H, m, H-1"), 2.12-1.72 (6H, m, H-4",5",6"). MS (EI): *m/z* 342 (M+, 100%). Anal. Calcd. for C19H15ClO4: C, 66.58 ; H, 4.41. Found: C, 66.55; H, 4.39.

Compound **1c**(R = H)**.** Yield 60%, white solid; mp 85-87 ºC; **max THF(nm) 259, 348; **max(cm-1) 1642(C=O), 1602 (C=C); δH (CDCl3) 8.20 (1H, d, *J*m=2.4 Hz, H-5), 7.73 (1H, d, *J*5',4'=1.7 Hz, H-5'), 7.62 (1H, dd, *J*m,o 2.4 Hz, 9.0 Hz, H-7), 7.55 (1H, d, *J*m=9.0 Hz, H-8), 7.45 (1H, d, *J*3',4' 3.6 Hz, H-3'), 6.65 (1H, dd, *J*4',5'=1.7 Hz, *J*4',3'=3.6 Hz, H-4'), 5.95-5.79 (2H, m, H- 2",3"), 5.67-5.62 (1H, m, H-1"), 2.21-1.61 (8H, m, H-4",5",6",7"). MS (EI): *m/z* 356 (M+, 100%). Anal. Calcd. for C20H17ClO4: C, 67.32; H, 4.80. Found: C, 67.35; H, 4.78.

Compound **1d**(R = H)**.** Yield 55%, white solid; mp 125-126 ºC; **max THF(nm) 256, 325 **max(cm-1) 1639 (C=O), 1606 (C=C); δH (CDCl3) 8.17 (1H, d, *J*m=2.4 Hz, H-5), 7.70 (1H, d, *J*5',4'=1.7 Hz, H-5'), 7.58 (1H, dd, *J*m,o 2.4 Hz, 9.0 Hz, H-7), 7.55 (1H, d, *J*m=9.0 Hz, H-8), 7.45 (1H, d, *J*3',4' 3.6 Hz, H-3'), 6.65 (1H, dd, *J*4',5'=1.7 Hz, *J*4',3'=3.2 Hz, H-4'), 5.96-5.92 (1H, m, H-3"), 5.62-5.45 (2H, m, H-2",1"), 2.25-2.18 (2H, m, H-4"), 2.01-1.65 (8H, m, H-5",6",7",8"). MS (EI): *m/z* 370 (M+, 100%). Anal. Calcd. for C21H19ClO4 : C, 68.02; H, 5.16. Found: C, 68.05; H, 5.14.

Compound **2a**(R = CH3)**.** Yield 57%, white solid; mp 106-107 oC; **max (cm-1) 1640 (C=O), 1603 (C=C); δH (CDCl3) 8.20 (1H, d, *J*m=2.4 Hz, H-5), 7.62 (1H,dd, *J*m,o=2.4 Hz, 9.0 Hz, H-7), 7.54 (1H, d, *J*o=9.0 Hz,H-8), 7.41 (1H, d, *J*3',4'=3.6 Hz, H-3'), 6.23 (1H, dd, *J*4',3'=3.6 Hz, *J*allyl=9.0 Hz, H-4'), 5.92-5.83 (2H, m, H-2",3"), 5.38-5.30 (1H, m, H-1"), 2.41 (3H, s, –CH3), 2.19-1.87 (4H, m, H-4",5"). MS (EI): *m/z* 342 (M+, 100%). Anal. Calcd. for C19H15ClO4: C, 66.58 ; H, 4.41. Found: C, 66.60; H, 4.39.

Compound **2b**(R = CH3)**.** Yield (61%), white solid; mp 114-116 oC; **max (cm-1) 1641(C=O) 1602 (C=C); δH (CDCl3) 8.19 (1H, d, *J*m=2.4 Hz, H-5), 7.60 (1H, dd, *J*m,o=2.4 Hz, 9.0 Hz, H-7), 7.49 (1H, d, *J*o=9.0 Hz,H-8), 7.39 (1H, d, *J*3',4'=3.6 Hz, H-3'), 6.18 (1H, dd, *J*4',3'=3.6, Hz, *J*allyl=9.0 Hz, H-4'), 5.98-5.94 (2H, m, H-2",3"), 5.50-5.42 (1H, m, H-1"), 2.44 (3H, s, –CH3), 2.22-1.60 (6H, m, H-4",5",6"). MS (EI): *m/z* 356 (M+, 100%). Anal. Calcd. for C20H17ClO4: C, 67.32; H, 4.80. Found: C, 67.28; H, 4.82.

Compound **2c**(R = CH3)**.** Yield 51%, white solid; mp 126-128 oC; **max (cm-1) 1640 (C=O), 1603 (C=C); δH (CDCl3) 8.23 (1H, d, *J*m=2.4 Hz, H-5), 7.65 (1H,dd, *J*m,o=2.4 Hz, 9.0 Hz, H-7), 7.53 (1H, d, *J*o=9.0 Hz,H-8), 7.40 (1H, d, *J*3',4'=3.6 Hz, H-3'), 6.25 (1H, dd, *J*4',3'=3.6 Hz, *J*allyl=9.0 Hz, H-4'), 5.98-5.90 (1H, m, H-3"), 5.55-5.46 (2H, m, H-1",2"), 2.48 (3H, s, -CH3), 2.28-2.19 (2H, m, H-4'), 2.05-1.57 (8H, m, H-5",6",7",8"). MS (EI): *m/z* 384 (M+, 100%). Anal. Calcd. for C22H21ClO4: C, 68.66; H, 5.50. Found: C, 68.3; H, 5.47.

Compound **5a**(R = H)**.** Yield 10%, white solid; mp 173-175 oC; **max (cm-1) 1605 (C=C), 1652 (C=O); δH (CDCl3) 8.20 (1H, d, *J*m=2.4 Hz, H-7), 7.60 (1H, dd, *J*m,o=2.4 Hz, 9.0 Hz, H-9), 7.47 (1H, d, *J*o=9.0 Hz, H-10), 6.54 (1H, d, *J*2,3=2.7 Hz, H-2), 6.15-6.12 (1H, m, H-3'), 5.81-5.79 (1H, m, H-2'), 5.15 (1H, d, *J*11b,3a=9.6 Hz, H-11b), 5.07-5.05 (1H, m, H-3), 3.51-3.47 (1H, d, *J*3a ,11b=9.6 Hz, H-3a), 2.23-1.90 (4H, m, H-4',5'). MS (EI): *m/z* 328 (M+, 100%). Anal. Calcd. for C18H13ClO4: C, 65.76; H, 3.99. Found: C, 65.73; H, 3.97.

Compound **6a** (R = H)**.** Yield 3%, white solid; mp 185-186 oC; **max (cm-1) 1695 (C=O), 1637 (C=O), 1605 (C=C); δH (CDCl3) 9.68 (1H, d, *J=*2.4 Hz, -CHO), 8.18 (1H, d, *J*m=2.4 Hz,H-7), 7.54 (1H, dd, *J*m,o=2.4 Hz, 9.0 Hz, H-9), 7.38 (1H, d, *J*o=9.0 Hz, H-10), 5.96-5.91 (1H, m, H-3'), 5.64-5.59 (1H, m, H-2'), 2.90 (1H, dd, *J*1,3=3.6 Hz, *J*1,2=4.8 Hz, H-1), 2.74 (1H, dd, *J*3,1=3.6 Hz, *J*3,2=9.0 Hz, H-3), 2.56 (1H, dd, *J*2,1=4.8 Hz, *J*2,3=9.0 Hz, H-2), 2.17-1.99 (4H, m, H-4',5'). MS (EI): *m/z* 328 (M+, 100%). Anal. Calcd. for C18H13ClO4: C, 65.76; H, 3.99. Found: C, 65.74; H, 3.96.

Compound **5b**(R = H)**.** Yield 26%, white solid; mp 178-180 oC; **max (cm-1) 1644 (C=O), 1603 (C=C); δH (CDCl3) 8.18 (1H, d, *J*m=2.4 Hz, H-7), 7.55 (1H, dd, *J*m,o=2.4 Hz, 9.0 Hz, H-9), 7.40 (1H, d, *J*o=9.0 Hz, H-10), 6.50 (1H, d, *J*2,3=2.7 Hz, H-2), 6.10-6.02 (1H, m, H-3'), 5.70 (1H, d, *J*2',3'=10.0 Hz, H-2'), 5.35 (1H, d, *J*11b,3a=9.6 Hz, H-11b), 5.10-5.07 (1H, m, H-3), 3.45 (1H, d, *J*3a ,11b=9.6 Hz, H-3a), 2.22-1.68 (6H, m, H-4',5',6'). MS (EI): *m/z* 356 (M+, 100%). Anal. Calcd. for C20H17ClO4: C, 67.32; H, 4.80. Found: C, 67.29; H, 4.79.

Compound **6b**(R = H)**.** Yield 15%, white solid; mp 192-195 oC; **max (cm-1) 1696 (C=O), 1642 (C=O), 1605 (C=C); δH (CDCl3) 9.70 (1H, d, *J=*2.4 Hz, -CHO), 8.20 (1H, d, *J*m=2.4 Hz,H-7), 7.56 (1H, dd, *J*m,o=2.4 Hz, 9.0 Hz, H-9), 7.40 (1H, d, *J*o=9.0 Hz, H-10), 5.98-5.93 (1H, m, H-3'), 5.62 (1H, d, *J*2',3'=10.0 Hz, H-2'), 2.92 (1H, dd, *J*1,3=3.6 Hz, *J*1,2=4.8 Hz, H-1), 2.76 (1H, dd, *J*3,1=3.6 Hz, *J*3,2=9.0 Hz, H-3), 2.58 (1H, dd, *J*2,1=4.8 Hz, *J*2,3=9.0 Hz, H-2), 2.24-1.73 (6H, m, H-4',5',6'). MS (EI): *m/z* 356 (M+, 100%). Anal. Calcd. for C20H17ClO4: C, 67.32; H, 4.80. Found: C, 7.29; H, 4.82.

Compound **5c**(R = H)**.** Yield 10%, white solid; mp 163-165 oC; **max (cm-1) 1655 (C=O), 1605 (C=C); δH (CDCl3) 8.20 (1H, d, *J*m=2.4 Hz, H-7), 7.57 (1H, dd, *J*m,o=2.4 Hz, 9.0 Hz, H-9), 7.45 (1H, d, *J*o=9.0 Hz, H-10), 6.42 (1H, d, *J*2,3=2.7 Hz, H-2), 5.97-5.88 (1H, m, H-3'), 5.70 (1H, d, *J*2',3'=11.7 Hz, H-2'), 5.38 (1H, d, *J*11b,3a=9.9 Hz, H-11b), 5.10-5.07 (1H, m, H-3), 3.85 (1H, d, *J*3a ,11b=9.9 Hz, H-3a), 2.39-1.88 (8H, m, H-4',5',6',7'). MS (EI): *m/z* 356 (M+, 100%). Anal. Calcd. for C20H17ClO4: C, 67.32; H, 4.80. Found: C, 67.29; H, 4.82.

Compound **6c**(R = H)**.** Yield 8%, white solid; mp 168-169 oC; **max (cm-1) 1695 (C=O), 1648 (C=O), 1610 (C=C); δH (CDCl3) 9.74 (1H, d, *J=*2.4 Hz, -CHO), 8.20 (1H, d, *J*m=2.4 Hz,H-7), 7.56 (1H, dd, *J*m,o=2.4 Hz, 9.0 Hz, H-9), 7.40 (1H, d, *J*o=9.0 Hz, H-10), 5.92-5.86 (1H, m, H-3'), 5.50 (1H, d, *J*2',3'=11.7 Hz, H-2'), 2.90 (1H, dd, *J*1,3=3.6 Hz, *J*1,2=4.8 Hz, H-1), 2.75 (1H, dd, *J*3,1=3.6 Hz, *J*3,2=9.0 Hz, H-3), 2.49 (1H, dd, *J*2,1=4.8 Hz, *J*2,3=9.0 Hz, H-2), 2.34-1.73 (8H, m, H-4',5',6',7'). MS (EI): *m/z* 356 (M+, 100%). Anal. Calcd. for C20H17ClO4: C, 67.32; H, 4.80. Found: C, 67.31; H, 4.78.

Compound **5d**(R = H)**.** Yield 12%, white solid; mp 174-176 oC; **max (cm-1) 1646 (C=O), 1610 (C=O); δH (CDCl3) 8.13 (1H, d, *J*m 2.4 Hz, H-7), 7.50 (1H, dd, *J*m,o=2.4 Hz, 9.0 Hz, H-9), 7.37 (1H, d, *J*o=9.0 Hz, H-10), 6.34 (1H, d, *J*2,3=2.7 Hz, H-2), 5.70-5.60 (1H, m, H-3'), 5.39 (1H, d, *J*2',3'=11.7 Hz, H-2'), 5.28 (1H, d, *J*11b,3a=9.9 Hz, H-11b), 5.05 (1H, t, *J* =2.7 Hz, H-3), 3.52 (1H, d{t}, *J*=9.9 Hz, 2.7 Hz, H-3a), 2.81-2.76 (1H, m, H-4'), 2.28 - 2.24 (1H, m, H-4'), 2.02-1.47 (8H, m, H-5',6',7',8'). MS (EI): *m/z* 384 (M+, 100%). Anal. Calcd. for C22H21ClO4: C, 68.66; H, 5.50. Found: C, 68.68; H, 5.48.

Compound **6d**(R = H)**.** Yield 3%, white solid; mp 168-171 oC; **max (cm-1) 1692 (C=O), 1645 (C=O), 1617 (C=C); δH (CDCl3) 9.65 (1H, d, *J=*2.4 Hz, -CHO), 8.18 (1H, d, *J*m=2.4 Hz,H-7), 7.56 (1H, dd, *J*m,o=2.4 Hz, 9.0 Hz, H-9), 7.38 (1H, d, *J*o=9.0 Hz, H-10), 5.70-5.64 (1H, m, H-3'), 5.40 (1H, d, *J*2',3'=11.7 Hz, H-2'), 2.88 (1H, dd, *J*1,3=3.6 Hz, *J*1,2=4.8 Hz, H-1), 2.68 (1H, dd, *J*3,1=3.6 Hz, *J*3,2=9.0 Hz, H-3), 2.52 (1H, dd, *J*2,1=4.8 Hz, *J*2,3=9.0 Hz, H-2), 2.84-2.82 (1H, m, H-4'), 2.28-2.20 (1H, m, H-4'), 2.11-1.54 (8H, m, H-5',6',7',8'). MS (EI): *m/z* 384 (M+, 100%). Anal. Calcd. for C22H21ClO4: C, 68.66; H, 5.50. Found: C, 68.62; H, 5.48.

Compound **7a** (R = CH3)**.** Yield 18%, white solid; mp 170-172 oC; **max (cm-1) 1605 (C=C), 1640 (C=O), 1694 (C=O); δH (CDCl3) 8.17 (1H, d, *J*m 2.4 Hz H-7), 7.56 (1H, dd, *J*m,o=2.4 Hz, 9.0 Hz, H-9), 7.39 (1H, d, *J*o=9.0 Hz, H-10), 6.10-6.08 (1H, m, H-3'), 5.71-5.69 (1H, m, H-2'), 2.90 (1H, dd, *J*1,3=3.6 Hz, *J*1,2=4.8 Hz, H-1), 2.70 (1H, dd, *J*3,1=3.6 Hz, *J*3,2=9.0 Hz, H-3), 2.47 (1H, dd, *J*2,1=4.8 Hz, *J*2,3=9.0 Hz, H-2), 2.41 (3H, s, -COCH3), 2.38-2.21 (4H, m, H-4',5'). MS (EI): *m/z* 342 (M+, 100%). Anal. Calcd. for C19H15ClO4: C, 66.58 ; H, 4.41. Found: C, 66.62; H, 4.38.

Compound **7b** (R = CH3)**.** Yield 20%, white solid; mp 182-184 oC; **max (cm-1) 1603 (C=C), 1641 (C=O), 1696 (C=O); δH (CDCl3) 8.19 (1H, d, *J*m=2.4 Hz, H-7), 7.58 (1H, dd, *J*m,o=2.4 Hz, 9.0 Hz, H-9), 7.41 (1H, d, *J*o=9.0 Hz, H-10), 6.12-6.10 (1H, m, H-3'), 5.73-5.70 (1H, m, H-2'), 2.96 (1H, dd, *J*1,3=3.6 Hz, *J*1,2=4.8 Hz, H-1), 2.78 (1H, dd, *J*3,1=3.6 Hz, *J*3,2=9.0 Hz, H-3), 2.51 (1H, dd, *J*2,1=4.8 Hz, *J*2,3=9.0 Hz, H-2), 2.45 (3H, s, -COCH3), 2.39-2.18 (6H, m, H-4',5',6'). MS (EI): *m/z* 356 (M+, 100%). Anal. Calcd. for C20H17ClO4: C, 67.32; H, 4.80. Found: C,67.28; H, 4.81.

Compound **7c** (R = CH3)**.** Yield 20%, white solid; mp 193-194 oC; **max (cm-1) 1602 (C=C), 1658 (C=O), 1703 (C=O); δH (CDCl3) 8.15 (1H, d, *J*m=2.4 Hz,H-7), 7.54 (1H, dd, *J*m,o=2.4 Hz, 9.0 Hz, H-9), 7.38 (1H, d, *J*o=9.0 Hz, H-10), 5.68-5.62 (1H, m, H-3'), 5.46 (1H, d, *J*2',3'=11.4 Hz, H-2'), 2.92 (1H, dd, *J*1,3=3.6 Hz, *J*1,2=4.8 Hz, H-1), 2.68 (1H, dd, *J*3,1=3.6 Hz, *J*3,2=9.0 Hz, H-3), 2.50 (1H, dd, *J*2,1=4.8 Hz, *J*2,3=9.0 Hz, H-2), 2.37 (3H, s, -COCH3), 2.84-2.80 (1H, m, H-4'), 2.28-2.20 (1H, m, H-4'), 2.07-1.52 (8H, m, H-5',6',7',8'). MS (EI): *m/z* 384 (M+, 100%). Anal. Calcd. for C22H21ClO4: C, 68.66; H, 5.50. Found: C, 68.54; H, 5.55.
